# Supplementary material for: Boosting the in-plane thermal conductivity of nanofibrillated cellulose films: alignment engineering of cross-linked AlN whiskers
Source: Royal Society of Chemistry journal article supplement (doi:10.1039/d3ta04770a), 2023-01-01
Supplement: d3ta04770a1.pdf [file d3ta04770a1.pdf]

## Supporting Information

### **Boosting the in-plane thermal conductivity of nanofibrillated cellulose films: alignment engineering of cross-linked AlN whiskers**

Mengyang Niu<sup>a,#</sup>, Zheng Zhao<sup>a,#</sup>, Baokai Wang<sup>a</sup>, Chang Yu<sup>a</sup>, Mengyi Li<sup>a</sup>, Jiajun Hu<sup>b</sup>,  
Lifeng Zhu<sup>a,\*</sup>, Xu Hao<sup>a</sup>, Shiqin Wan<sup>a</sup>, Ming Yue<sup>c</sup>, Weiwei Xuan<sup>d</sup>, Qipeng Lu<sup>a</sup>, Wenbin  
Cao<sup>a,\*</sup>, Kexin Chen<sup>e,\*</sup>, Qi Wang<sup>a,\*</sup>

<sup>a</sup> *School of Materials Science and Engineering, University of Science and Technology  
Beijing, Beijing 100083, China*

<sup>b</sup> *State Key Laboratory for Mechanical Behavior of Materials, Xi'an Jiaotong  
University, Xi'an, 710049, China.*

<sup>c</sup> *School of Civil and Resource Engineering, University of Science and Technology  
Beijing, Beijing 100083, China*

<sup>d</sup> *School of Energy and Environmental Engineering, University of Science and  
Technology Beijing, Beijing 100083, China*

<sup>e</sup> *State Key Laboratory for Advanced Metals and Materials, University of Science and  
Technology Beijing, Beijing, 100083, China*

# Mengyang Niu and Zheng Zhao contributed equally to this work.

\*Corresponding authors: zhu@ustb.edu.cn (L. Zhu), wbcao@ustb.edu.cn (W. Cao),

kxchen@ustb.edu.cn (K. Chen), wangqi15@ustb.edu.cn (Q. Wang)

**Table S1.** Correspondence between mass fractions and volume fractions of AlNw in the composites.

| Sample      | Mass fraction of AlNw<br>(wt%) | Volume fraction of AlNw<br>(vol%) |
|-------------|--------------------------------|-----------------------------------|
| NFC/AlNw-20 | 20                             | 10.2                              |
| NFC/AlNw-40 | 40                             | 23.2                              |
| NFC/AlNw-60 | 60                             | 40.5                              |
| NFC/AlNw-70 | 70                             | 51.4                              |

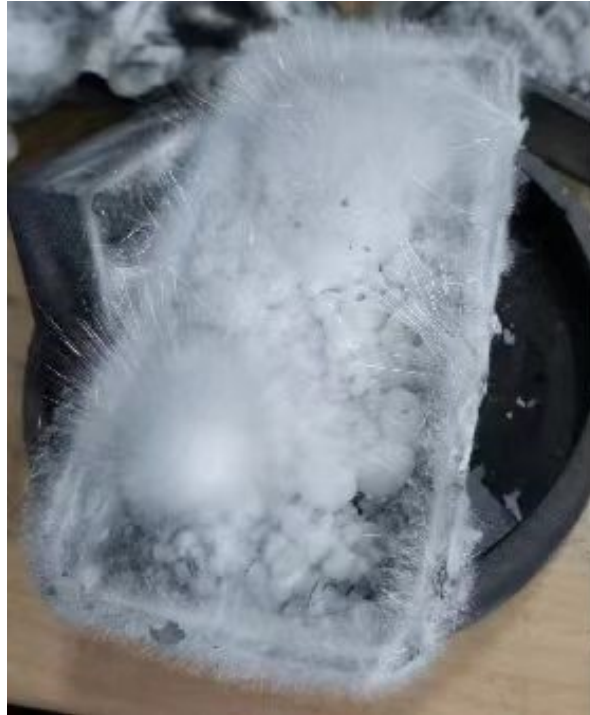

**Figure S1.** Digital photographs of AlNw grown in the crucible.

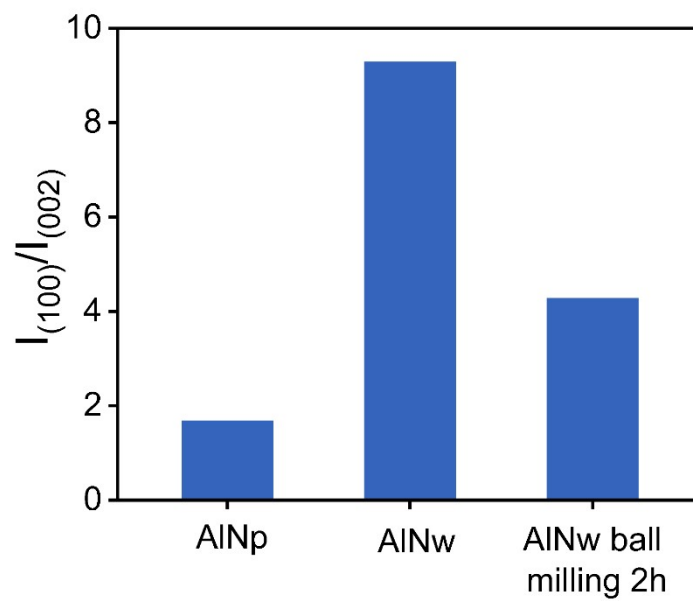

**Figure S2.** The  $I_{(100)}/I_{(002)}$  of AlNp, as-synthesized AlNw and AlNw after ball milling.

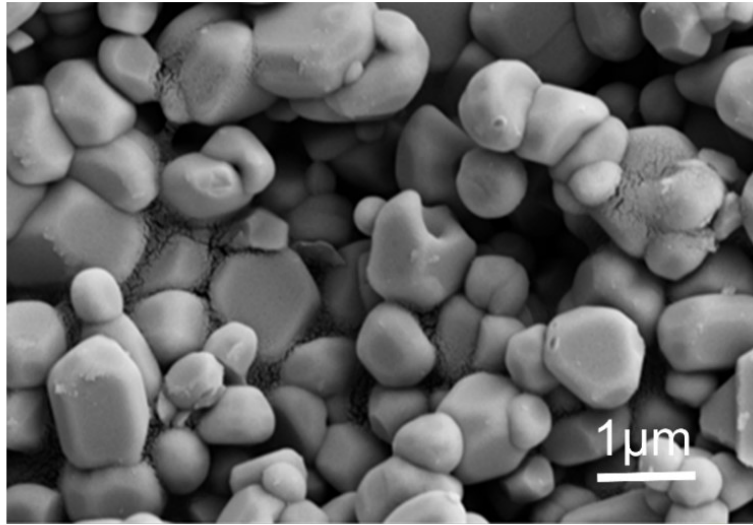

**Figure S3.** SEM image of commercial AlNp.

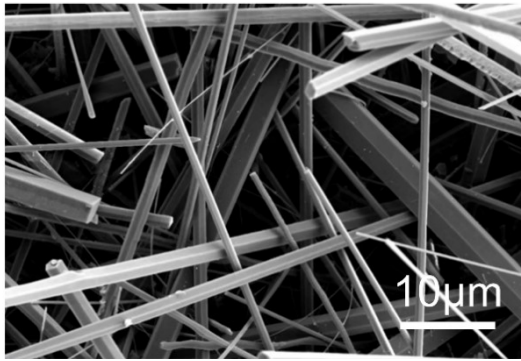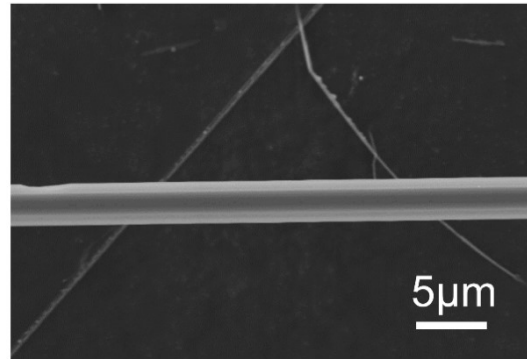

**Figure S4.** SEM image of AlNw with different magnifications.

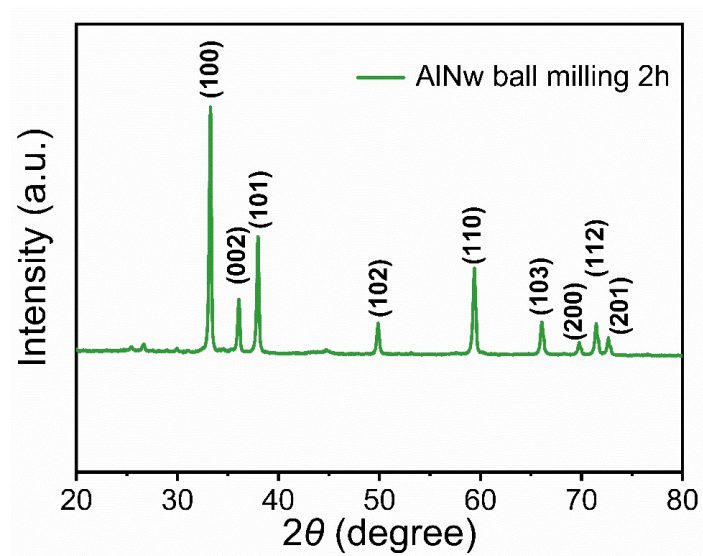

**Figure S5.** XRD pattern of AlNw after ball-milling.

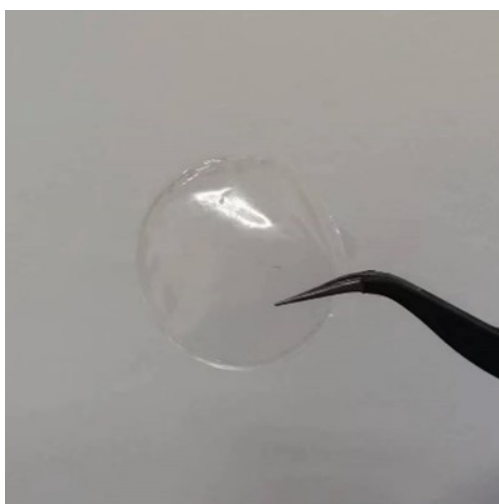

**Figure S6.** The macroscopic morphology of pure NFC film.

**Table S2.** XRD information of NFC/ AlNw -x composite films

| Sample      | $I_{(100)}$ | $I_{(002)}$ | $I_{(100)}/I_{(002)}$ |
|-------------|-------------|-------------|-----------------------|
| NFC/AlNw-20 | 12810       | 1037        | 12.4                  |
| NFC/AlNw-40 | 10264       | 838         | 12.2                  |
| NFC/AlNw-60 | 9442        | 916         | 10.3                  |
| NFC/AlNw-70 | 8384        | 971         | 8.6                   |

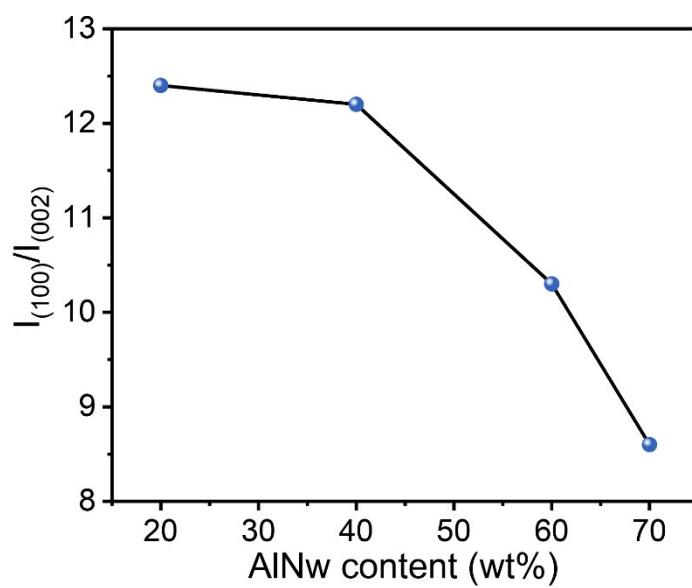

**Figure S7.** The  $I_{(100)}/I_{(002)}$  of NFC/AlNw- $x$  composite films.

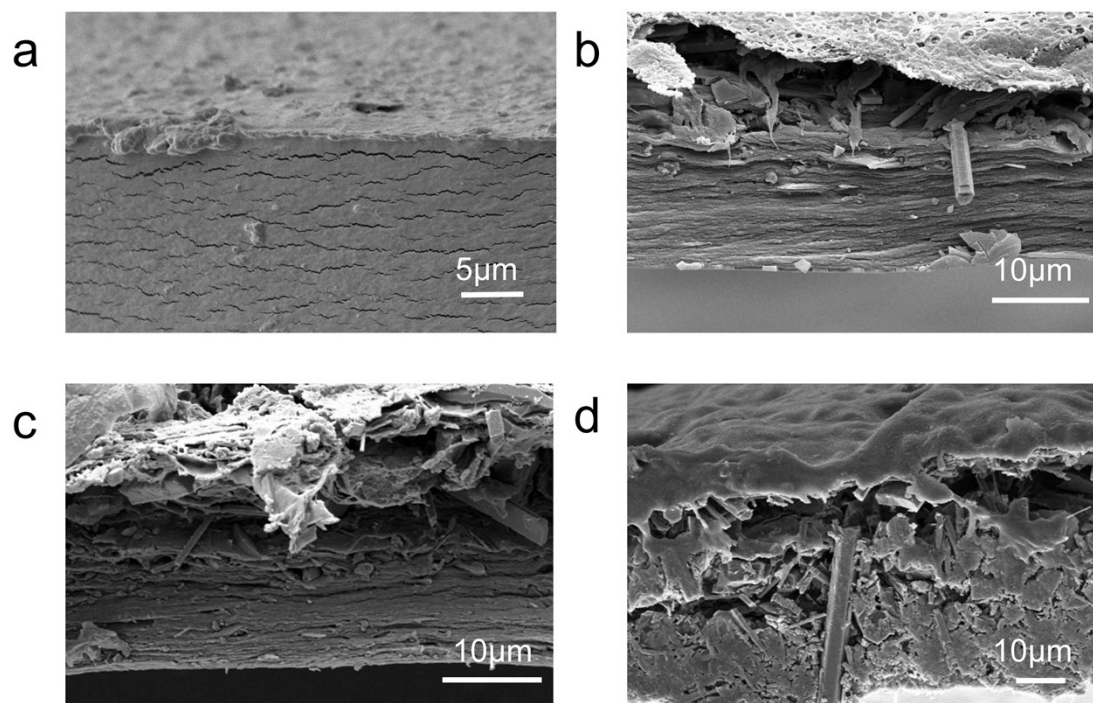

**Figure S8.** The cross-sectional SEM images of the NFC films with different filling fraction: (a) pure NFC; (b) NFC/AlNw-20; (c) NFC/AlNw-40; (d) NFC/AlNw-60.

***Simulation process of the interface thermal resistance between AlNw and NFC matrix by the EMA model***

According to the EMA model, the in-plane thermal conductivity can be calculated using the following equation<sup>1, 2</sup>:

$$\lambda = \lambda_{11} = \lambda_{22} = \lambda_m \left\{ \frac{2 + V_f \left[ \frac{\lambda_p}{\lambda_m} (1 + \langle \cos^2 \theta \rangle) \right]}{2 - V_f \left[ \frac{\lambda_p d - \lambda_m d - R_{cl} \lambda_p \lambda_m (1 - \langle \cos^2 \theta \rangle)}{\lambda_p d} \right]} \right\} \quad (1)$$

where  $\lambda_{11}$  and  $\lambda_{22}$  referred to the thermal conductivities of the composite film in different in-plane directions,  $\lambda_m$  and  $\lambda_p$  was the thermal conductivity of the polymer matrix and the filler, respectively;  $V_f$  was the volume fraction of the filler,  $d$  was the diameter of the filler,  $\theta$  was the angle between the axis of symmetry at a local position within the composites and the direction perpendicular to the plane, and  $R_{cl}$  represented the interfacial thermal resistance between the filler and the matrix. For the NFC/AlNw composite film,  $\lambda_m$  was taken as  $1.63 \text{ W} \cdot \text{m}^{-1} \cdot \text{K}^{-1}$ ,  $\lambda_p$  was taken as the theoretical value of AlN thermal conductivity ( $320 \text{ W} \cdot \text{m}^{-1} \cdot \text{K}^{-1}$ ), and  $d$  was set to  $2 \text{ } \mu\text{m}$ . The average value of  $\theta$  was calculated by selecting over 10 AlNw in the SEM image of the composite film cross-section. In equation (1), all the parameters are known except for  $R_{cl}$ . By varying the value of  $R_{cl}$ , the thermal conductivity  $\lambda$  of the composite film was calculated and fitted with experimental data.

***Simulation process of the interface thermal resistance between AlNw using Foygel model***

In order to calculate the interfacial thermal resistance ( $R_{c2}$ ) between AlNw, we introduced the Foygel model. This model was defined as follows<sup>3,4</sup>:

$$K(V_f, p) = K_0(V_f - V_c)^{t(p)} \quad (2)$$

$$V_c(p > 1) \approx \frac{0.60}{p} \quad (3)$$

where  $K_0$  represented the prefactor contribution of the thermal conductivity from the individual AlNw filler network,  $V_f$  was the volume fraction of the filler,  $V_c$  was the critical volume fraction of the filler at the thermal percolation threshold, obtained from equation (3);  $p$  represented the aspect ratio of AlNw ( $p = L/d$ ), where  $L$  was the length of AlNw ( $\sim 94.97 \mu\text{m}$ ) and  $d$  was set to  $2 \mu\text{m}$ .  $t(p)$  denoted the thermal conductivity exponent based on the aspect ratio of AlNw. The values of  $K_0$  and  $t(p)$  were obtained by fitting the thermal conductivity ( $K$ ) of the composite film using equation (2). Based on these parameters, the contact thermal resistance ( $R_0$ ) between the fillers could be calculated using the following equation:

$$R_0 = (K_0 L V_c^{t(p)})^{-1} \quad (4)$$

The calculated value of  $R_0$  was  $1.10 \times 10^3 \text{ K/W}$ , and the average contact area between adjacent AlNw fibers could be calculated using the following equation:

$$\overline{A_s} = \frac{2D^2}{\pi} \delta(p) \quad (5)$$

$$\delta(p) = \ln\left(\frac{\sqrt{1+p^{-1}} + \sqrt{1-p^{-1}}}{\sqrt{1+p^{-1}} - \sqrt{1-p^{-1}}}\right) \quad (6)$$



By using equations (5) and (6), we obtained a value of  $\bar{A}_s$  was  $1.17 \times 10^{-11} \text{ m}^2$ . Consequently, the interfacial thermal resistance between AlNw ( $R_{c2}$ ) was calculated as  $1.29 \times 10^{-8} \text{ m}^2\text{K/W}$ .

**Table S3.** Comparison of in-plane thermal conductivity between NFC/AlNw composite film and some previously reported composite films.

| Composites                             | Loading(wt%) | $\lambda_{//}$ (W/(m·K)) | References |
|----------------------------------------|--------------|--------------------------|------------|
| NFC/AlN                                | 25.0         | 4.20                     | 5          |
| PVA/ND@PDA                             | 10.0         | 5.86                     | 6          |
| NFC/MgO@rGO                            | 20.0         | 7.45                     | 7          |
| PVA/SiCNWs                             | 50.0         | 14.1                     | 8          |
| CNC/BNNTS                              | 20.0         | 13.33                    | 9          |
| PVA/NF-BNNS                            | 94.0         | 6.90                     | 10         |
| NFC/MBP                                | 15.0         | 17.60                    | 11         |
| PVA/FGN                                | 80.0         | 21.60                    | 12         |
| PVA/MWCNT-BN                           | 20.0         | 11.49                    | 13         |
| CNF/H-MoS <sub>2</sub> @SiCNWs         | 40.0         | 19.76                    | 14         |
| PVA/Si <sub>3</sub> N <sub>4</sub> NWs | 50.0         | 15.40                    | 15         |
| PVA/rGO                                | 5.0          | 4.00                     | 16         |
| PMIA/AlN                               | 50.0         | 17.30                    | 17         |
| NFC/AlNw                               | 20.0         | 18.04                    | This work  |
| NFC/AlNw                               | 70.0         | 22.78                    | This work  |

### ***Heat transfer simulation process for pure NFC, NFC/AlN<sub>p</sub>, and NFC/AlN<sub>w</sub> models***

Finite element simulations were carried out to simulate the heat transfer processes of three typical models, that was pure NFC, NFC/AlN<sub>p</sub>, and NFC/AlN<sub>w</sub> films, using the COMSOL Multiphysics 5.4 software. For ease of setting the heat source surface, we modeled the NFC matrix as a cylindrical ring with an inner diameter of 10 μm, an outer diameter of 100 μm, and a thickness of 10 μm. In the model of the NFC/AlN spheres composite film, AlN spheres were approximated as spherical particles with a diameter of 1 μm. A total of 156 AlN spheres particles were randomly distributed within the matrix. In the model of the NFC/AlN whiskers composite film, AlN whiskers were approximated as rod-shaped structures with a length of 30 μm and a diameter of 1 μm. A total of 28 rods were arranged in the in-plane direction of the NFC matrix, ensuring that the total volume of AlN whiskers was equivalent to that of AlN spheres. The material properties were selected from the built-in material library of the software. The initial temperature of the inner surface of the cylindrical ring was set to 373.15 K as the heat source, while the initial temperatures of the remaining regions were set to room temperature, 293.15 K. Transient temperature distributions of the three models were computed and simulated.

## References

- 1 Q. Li, Y. Guo, W. Li, S. Qiu, C. Zhu, X. Wei, M. Chen, C. Liu, S. Liao, Y. Gong, A. K. Mishra and L. Liu, *Chem. Mater.*, 2014, **26**, 4459-4465.
- 2 C.-W. Nan, R. Birringer, D. R. Clarke and H. Gleiter, *J. Appl. Phys.*, 1997, **81**, 6692-6699.
- 3 M. Foygel, R. D. Morris, D. Anez, S. French and V. L. Sobolev, *Phys. Rev. B*, 2005, **71**, 4201.
- 4 Y. Zhang, C. Lei, K. Wu and Q. Fu, *Adv. Sci.*, 2021, **8**, e2004821.
- 5 K. Zhang, P. Tao, Y. Zhang, X. Liao and S. Nie, *Carbohydr. Polym.*, 2019, **213**, 228-235.
- 6 B. Nan, K. Wu, W. Chen, Y. Liu, Q. Zhang and M. Lu, *Appl. Surf. Sci.*, 2020, **508**, 144797.
- 7 M. Ma, L. Xu, L. Qiao, S. Chen, Y. Shi, H. He and X. Wang, *Chem. Eng. J.*, 2020, **392**, 123714.
- 8 Z. Chen, S. Gao, J. Zhang, D. Liu, J. Zeng, Y. Yao, J.-B. Xu and R. Sun, *Compos. Commun.*, 2023, **41**, 101654.
- 9 Q. He, L. Ding, L. Wu, Z. Zhou, Y. Wang, T. Xu, N. Wang, K. Zhang, X. Wang, F. Ding, J. Zhang and Y. Yao, *Small Struct.*, 2023, **4**, 2200282.
- 10 Z. Xiaoliang, Y. Lei, Y. Shuhui, L. Hao, S. Rong, X. Jianbin and W. Ching-Ping, *Nanoscale*, 2015, **7**, 6774-6781.
- 11 J. Hu, H. Xia, X. Hou, T. Yang, K. Si, Y. Wang, L. Wang and Z. Shi, *J. Mater. Chem. A*, 2021, **9**, 27049-27060.
- 12 X. Chen, M. Wang, J. Cheng, C. Zhao and Z. Tang, *Mater. Today Chem.*, 2023, **29**, 101422.
- 13 J. Zhou, Z. Yu, Y. Lv, C. Wang, P. Hu and Y. Liu, *Compos. Pt. A-Appl. Sci. Manuf.*, 2022, **163**, 107195.
- 14 B. Xue, S. Yang, X. Sun, L. Xie, S. Qin and Q. Zheng, *J. Mater. Chem. A*, 2020, **8**, 14506-14518.
- 15 S. Wan, X. Hao, L. Zhu, C. Yu, M. Li, Z. Zhao, J. Kuang, M. Yue, Q. Lu, W. Cao and Q. Wang, *ACS Appl. Mater. Interfaces*, 2023, **15**, 32885-32894.
- 16 F. Luo, M. Zhang, S. Chen, J. Xu, C. Ma and G. Chen, *Compos. Sci. Technol.*, 2021, **207**, 108707.
- 17 H. Ruan, F. Lü, J. Song, X. Bian, K. Yin, S. Yin and Q. Xie, *Compos. Sci. Technol.*, 2022, **224**, 109477.
